# Supplementary material for: Dietary Alaska Pollack Protein Induces Acute and Sustainable Skeletal Muscle Hypertrophy in Rats
Source: MDPI journal article supplement (doi:10.3390/nu14030547), 2022-01-27
Supplement: s1 [file s1]

**Supplementary table**

Table S1. The average, standard deviation (SD) and Coefficients of variation (CqCV%, SD/mean·100) of Cq for *Ppia* gene for each of the different groups.

|         | 2-days feeding |       | 7-days feeding |       | 56-days feeding |       |
|---------|----------------|-------|----------------|-------|-----------------|-------|
|         | Cas            | APP   | Cas            | APP   | Cas             | APP   |
| Average | 18.17          | 17.93 | 18.31          | 18.16 | 21.19           | 20.98 |
| SD      | 0.47           | 0.31  | 0.19           | 0.19  | 0.48            | 0.42  |
| CqCV%   | 2.56           | 1.74  | 1.06           | 1.05  | 2.25            | 1.99  |

Cas, casein; APP, Alaska pollack protein.
